# Supplementary material for: Closely related, yet unique: Distinct homo- and heterodimerization patterns of G protein coupled chemokine receptors and their fine-tuning by cholesterol
Source: PLOS journal article supplement (doi:10.1371/journal.pcbi.1006062), 2018-03-12
Supplement: S7 (10.1371/journal.pcbi.1006062.s007) [file journal.pcbi.1006062.s007]

**S1 Table Diffusion coefficients**

| System                           | Diffusion coefficient in $10^{-7}$ cm <sup>2</sup> /s |           |           |
|----------------------------------|-------------------------------------------------------|-----------|-----------|
|                                  | CXCR4                                                 | CCR5      | CCR2      |
| POPC (monomer)                   | 0.44±0.14                                             | 0.37±0.11 | 0.36±0.10 |
| POPC (homodimerization)          | 0.51±0.13                                             | 0.48±0.13 | 0.47±0.13 |
| POPC/10% chol (monomer)          | 0.33±0.03                                             | 0.25±0.05 | 0.29±0.09 |
| POPC/30% chol (homodimerization) | 0.26±0.06                                             | 0.23±0.06 | 0.23±0.06 |

**Protein self-diffusion coefficients.** According to the Einstein relation:

$$D_s = \lim_{t \rightarrow \infty} \frac{\langle \Delta r(t)^2 \rangle}{4t},$$

the lateral self-diffusion of proteins was calculated from the slope of the mean square displacement (MSD) averaged over all beads of each protein. Here,  $\Delta r(t)$  denotes the distance a bead moved in time  $t$ . The MSD was calculated for the initial 200 ns of the simulations. In case of dimerization simulations, the MSD was calculated for simulations that did not show interaction energies between the monomers until 250 ns. For calculations of the MSD, the center of mass motion of the protein-membrane system was subtracted. The slope of MSD curves was fitted on the time window between 5-20 ns. Data for CXCR4 was taken from Pluhackova *et al.*, PLoS Comput Biol, 2016;12(11):e1005169.
